# Supplementary material for: Estimating LAI for Cotton Using Multisource UAV Data and a Modified Universal Model
Source: MDPI journal article supplement (doi:10.3390/rs14174272), 2022-08-30
Supplement: s1 [file s1]

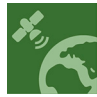**Table S1.** Canopy structure parameters derived from UAV-LiDAR point cloud in this study.

| LiDAR parameters                     | Parameters                                                                  | Description                                                                                                                                                                 |
|--------------------------------------|-----------------------------------------------------------------------------|-----------------------------------------------------------------------------------------------------------------------------------------------------------------------------|
| <b>Elevation -related parameters</b> | Percentile elevation ( <i>Elev_1st,....., Elev_99th</i> )                   | The percentiles of the elevation distributions (1th, 5th, 10th, 20th, 25th, 30th, 40th, 50th, 60th, 70th, 75th, 80th, 90th, 95th, 99th) of all points above 10cm            |
|                                      | Percentile accumulate elevation( <i>Elev_AIH_1st,....., Elev_AIH_99th</i> ) | The percentiles of the accumulate elevation distributions (1th, 5th, 10th, 20th, 25th, 30th, 40th, 50th, 60th, 70th, 75th, 80th, 90th, 95th, 99th) of all points above 10cm |
|                                      | Interquartile distance of elevation ( <i>Elev_IQ</i> )                      | The Interquartile distance of elevation of all points above 10cm                                                                                                            |
|                                      | Interquartile distance of accumulate elevation ( <i>Elev_AIHQ</i> )         | The Interquartile distance of accumulate elevation of all points above 10cm                                                                                                 |
|                                      | Absolute average deviation ( <i>Elev_aad_z</i> )                            | The absolute average deviation of the elevation of all points above 10cm                                                                                                    |
|                                      | Canopy relief ratio ( <i>Elev_canopy_relief_ratio</i> )                     | The canopy relief ratio of elevation of all points above 10cm                                                                                                               |
|                                      | cube root mean cubic of elevation ( <i>Elev_curt_mean_cube</i> )            | The cube root mean cubic of elevation of all points above 10cm                                                                                                              |
|                                      | The coefficient of variation of elevation ( <i>Elev_cv_z</i> )              | The coefficient of variation of elevation of all points above 10cm                                                                                                          |
|                                      | MADmedian ( <i>Elev_madmedian</i> )                                         | Median absolute deviation from the median                                                                                                                                   |
|                                      | Median of elevation ( <i>Elev_median_z</i> )                                | The median of the elevation above 10cm of all points                                                                                                                        |
|                                      | Mean elevation ( <i>Elev_mean</i> )                                         | The mean elevation above 10cm of all points                                                                                                                                 |
|                                      | Maximum elevation ( <i>Elev_max</i> )                                       | The maximum elevation above 10cm of all points                                                                                                                              |
|                                      | Minimum elevation ( <i>Elev_min</i> )                                       | The minimum elevation above 10cm of all points                                                                                                                              |
|                                      | Kurtosis of elevation ( <i>Elev_kurtosis</i> )                              | The kurtosis of the elevation of all points above 10cm                                                                                                                      |
|                                      | Variance of elevation ( <i>Elev_variance</i> )                              | The variance of the elevation of all points above 10cm                                                                                                                      |
|                                      | Standard deviation ( <i>Elev_stddev</i> )                                   | The standard deviation of elevation of all points above 10cm                                                                                                                |
|                                      | root mean square of elevation ( <i>Elev_sqrt_mean_sq</i> )                  | The root mean square of elevation of all points above 10cm                                                                                                                  |

|                                     |                                                                                                                                                                        |                                                                                                                                                                             |
|-------------------------------------|------------------------------------------------------------------------------------------------------------------------------------------------------------------------|-----------------------------------------------------------------------------------------------------------------------------------------------------------------------------|
|                                     | Skewness of elevation ( <i>Elev_skewness</i> )                                                                                                                         | The skewness of the elevation of all points above 10cm                                                                                                                      |
| <b>Density-related parameters</b>   | Canopy return density ( <i>D<sub>1</sub>, D<sub>2</sub>, D<sub>3</sub>, D<sub>4</sub>, D<sub>5</sub>, D<sub>6</sub>, D<sub>7</sub>, D<sub>8</sub>, D<sub>9</sub></i> ) | The proportion of points above the quantiles (10th, 20th, 30th, 40th, 50th, 60th, 70th, 80th, 90th) to total number of points                                               |
|                                     | Canopy cover above 10cm ( <i>Coverage</i> )                                                                                                                            | Percentages of first returns above 10cm                                                                                                                                     |
|                                     | Penetration above 10cm                                                                                                                                                 | Percentages of first not returned above 10cm                                                                                                                                |
|                                     |                                                                                                                                                                        |                                                                                                                                                                             |
| <b>Intensity-related parameters</b> | Percentile intensity ( <i>Int_1st, ..., Int_99th</i> )                                                                                                                 | The percentiles of the intensity distributions (1th, 5th, 10th, 20th, 25th, 30th, 40th, 50th, 60th, 70th, 75th, 80th, 90th, 95th, 99th) of all points above 10cm            |
|                                     | Percentile accumulate intensity ( <i>Int_All1st, ..., Int_All99th</i> )                                                                                                | The percentiles of the accumulate intensity distributions (1th, 5th, 10th, 20th, 25th, 30th, 40th, 50th, 60th, 70th, 75th, 80th, 90th, 95th, 99th) of all points above 10cm |
|                                     | Interquartile distance of accumulate intensity ( <i>Int_con_IQ</i> )                                                                                                   | The Interquartile distance of intensity of all points above 10cm                                                                                                            |
|                                     | Absolute average deviation ( <i>Int_aad_z</i> )                                                                                                                        | The absolute average deviation of the intensity of all points above 10cm                                                                                                    |
|                                     | The coefficient of variation of intensity ( <i>Int_cv_z</i> )                                                                                                          | The coefficient of variation of intensity of all points above 10cm                                                                                                          |
|                                     | MADmedian ( <i>Int_madmedian</i> )                                                                                                                                     | Median absolute deviation from the median                                                                                                                                   |
|                                     | Median of intensity ( <i>Int_median_z</i> )                                                                                                                            | The median of the intensity above 10cm of all points                                                                                                                        |
|                                     | Mean intensity ( <i>Int_mean</i> )                                                                                                                                     | The mean intensity above 10cm of all points                                                                                                                                 |
|                                     | Maximum intensity ( <i>Int_max</i> )                                                                                                                                   | The maximum intensity above 10cm of all points                                                                                                                              |
|                                     | Minimum intensity ( <i>Int_min</i> )                                                                                                                                   | The minimum intensity above 10cm of all points                                                                                                                              |
|                                     | Kurtosis of intensity ( <i>Int_kurtosis</i> )                                                                                                                          | The kurtosis of the intensity of all points above 10cm                                                                                                                      |
|                                     | Variance of intensity ( <i>Int_variance</i> )                                                                                                                          | The variance of the intensity of all points above 10cm                                                                                                                      |
|                                     | Standard deviation ( <i>Int_stddev</i> )                                                                                                                               | The standard deviation of intensity of all points above 10cm                                                                                                                |
|                                     | Skewness of intensity ( <i>Int_skewness</i> )                                                                                                                          | The skewness of the intensity of all points above 10cm                                                                                                                      |
